# Supplementary material for: Self-assembly of diphenylalanine peptides on graphene via detailed atomistic simulations
Source: Royal Society of Chemistry journal article supplement (doi:10.1039/d0cp03671d), 2020-01-01
Supplement: d0cp03671d1.pdf [file d0cp03671d1.pdf]

# Supporting Information

## Self-Assembly of Diphenylalanine Peptides on Graphene via Detailed Atomistic Simulations

**Anastassia N. Rissanou,<sup>1,2\*</sup> Andriani Keliri,<sup>1</sup> Maria Arnittali<sup>1,2</sup>  
and Vagelis Harmandaris<sup>1,2,3</sup>**

1. Institute of Applied and Computational Mathematics (IACM), Foundation for Research and Technology Hellas, (FORTH), IACM/FORTH, GR-71110 Heraklion, Greece.
2. Department of Mathematics and Applied Mathematics, University of Crete, GR-71409, Heraklion, Crete, Greece.
3. Computation-based Science and Technology Research Center, The Cyprus Institute, Nicosia 2121, Cyprus.

**Keywords:** Diphenylalanine, Graphene, Molecular Dynamics, Structure, Interface

---

\* Author to whom correspondence should be addressed:  
[risanou@uoc.gr](mailto:risanou@uoc.gr) +30 2810393746 fax: +30 2810393701

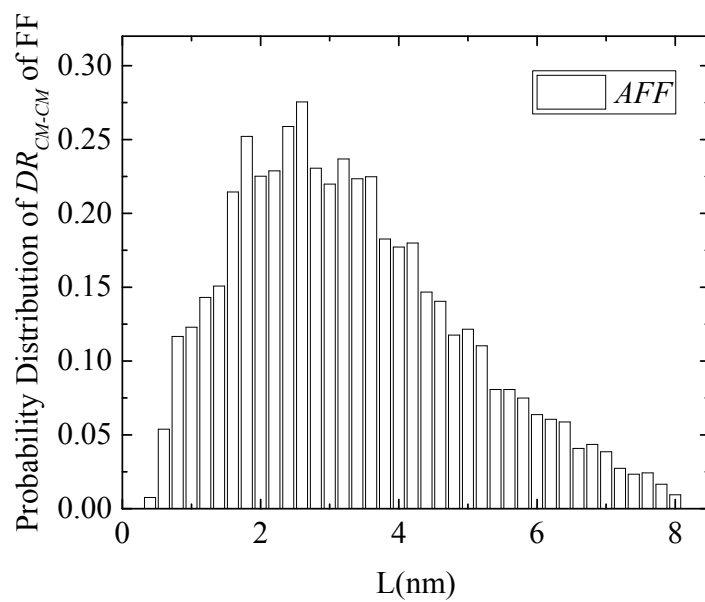

**Figure SI-1:** Probability distribution of distances among the centers of mass of FF in the initial configuration.

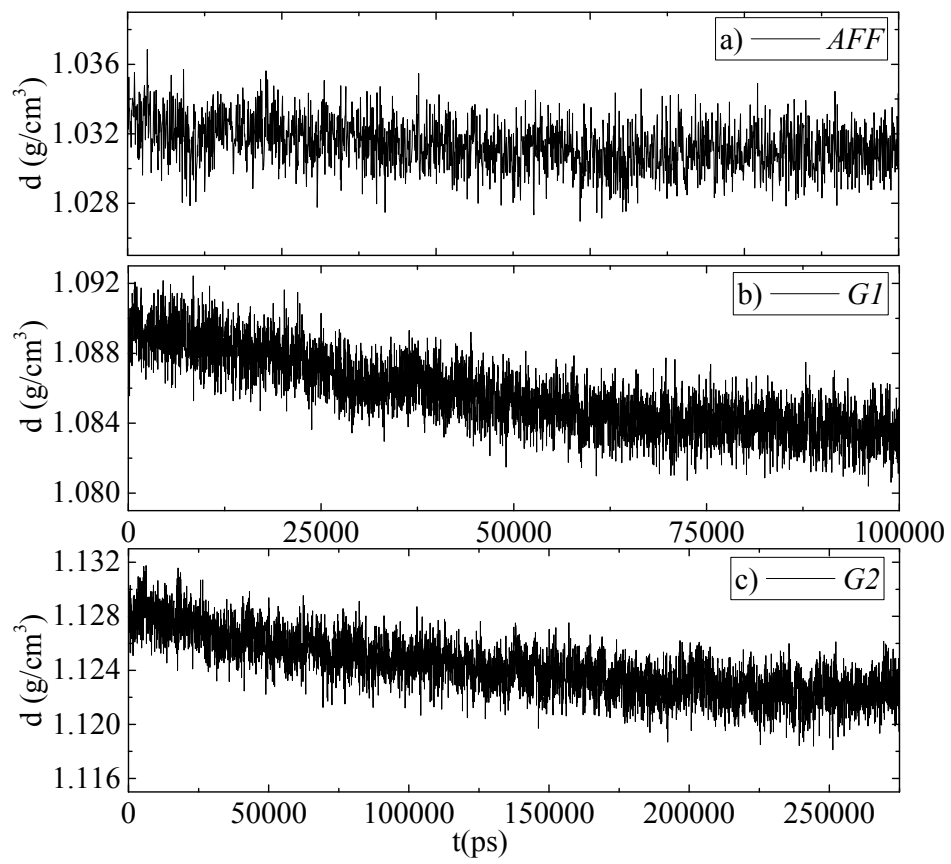

**Figure SI-2:** System density as a function of time for all three systems.

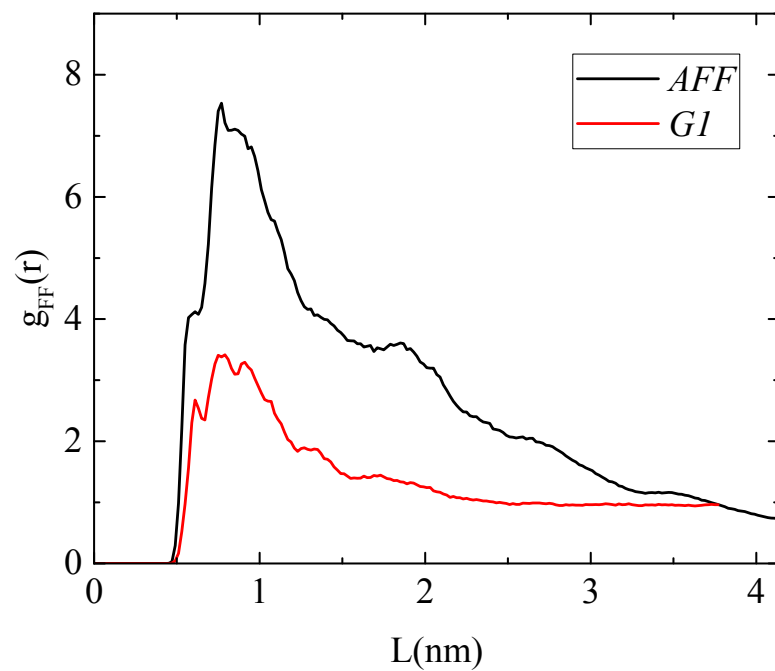

**Figure SI-3:** Pair radial distribution function between the centers of mass of FF in *AFF* (black curve) and in *GI* coming only from FF molecules whose center of mass is at distance  $> 1\text{nm}$  from the graphene surface.
